# Supplementary material
Source: PubMed Central journal article supplement (PMC3243565)

## Supplemental Data for

Pathway Profiling in *Mycobacterium tuberculosis*: Elucidation of a Cholesterol-Derived Catabolite  
and the Enzymes that Catalyze its Metabolism \*

**Suzanne T. Thomas,<sup>1,#</sup> Brian C. VanderVen,<sup>2,#,@</sup> David R. Sherman,<sup>3</sup> David G. Russell,<sup>2</sup> and  
Nicole S. Sampson<sup>1,@</sup>**

<sup>1</sup>Department of Chemistry, Stony Brook University, Stony Brook, NY 11794; <sup>2</sup>Department of  
Microbiology and Immunology, Cornell University, Ithaca, NY 14853; <sup>3</sup>Seattle Biomedical Research  
Institute, Seattle, WA 98109

Running title: *Cholesterol metabolic profile of the M. tb Δigr mutant*

<sup>@</sup>To whom correspondence should be addressed: Brian C. VanderVen, Department of Microbiology and  
Immunology, Cornell University, Ithaca, NY 14853, USA, E-mail: bcv8@cornell.edu; Nicole S.  
Sampson, Department of Chemistry, Stony Brook University, Stony Brook, NY 11794-3400, USA, E-  
mail: nicole.sampson@stonybrook.edu

**Table S1.** Cholesterol-derived metabolite parent ions (MH<sup>+</sup> or MNa<sup>+</sup>) identified using LC/MS/MS are listed. Data were analyzed with XCMS. The exact masses were utilized to determine molecular formulae. Unnatural <sup>13</sup>C isotopomers were used to identify cholesterol-derived compounds. Isotopomers and fragmentation were used to determine likely structures. Compound numbers correspond to the structures shown in Figure S2.

| <b>A. WT H37Rv and <i>igr</i> complement ions</b> |                                                |                        |                             |                                        |                   |                                  |
|---------------------------------------------------|------------------------------------------------|------------------------|-----------------------------|----------------------------------------|-------------------|----------------------------------|
| <b>Exact Mass</b>                                 | <b>Molecular Formula</b>                       | <b>Calculated Mass</b> | <b>Retention Time (min)</b> | <b>Number of <sup>13</sup>C labels</b> | <b>Compound</b>   | <b>Integrated Peak Intensity</b> |
| 299.1638                                          | C <sub>19</sub> H <sub>23</sub> O <sub>3</sub> | 299.1647               | 61.9                        | 3                                      | <b>4 + O - 2H</b> | 1.3E+07                          |
| 303.1950                                          | C <sub>19</sub> H <sub>27</sub> O <sub>3</sub> | 303.1960               | 66.5                        | 3                                      | <b>5 + O</b>      | 7.2E+06                          |
| 285.1845                                          | C <sub>19</sub> H <sub>25</sub> O <sub>2</sub> | 285.1855               | 69.9                        | 3                                      | <b>4</b>          | 3.0E+08                          |
| 287.2001                                          | C <sub>19</sub> H <sub>27</sub> O <sub>2</sub> | 287.2011               | 71.0                        | 3                                      | <b>5</b>          | 1.8E+08                          |
| <b>B. <i>Δigr</i> ions</b>                        |                                                |                        |                             |                                        |                   |                                  |
| <b>Exact Mass</b>                                 | <b>Molecular Formula</b>                       | <b>Calculated Mass</b> | <b>Retention Time (min)</b> | <b>Number of <sup>13</sup>C labels</b> | <b>Compound</b>   | <b>Integrated Peak Intensity</b> |
| 355.1746                                          | C <sub>18</sub> H <sub>27</sub> O <sub>7</sub> | 355.1757               | 57.0                        | 3                                      |                   | 9.7E+06                          |
| 297.1691                                          | C <sub>16</sub> H <sub>25</sub> O <sub>5</sub> | 297.1702               | 57.8                        | 3                                      | <b>6</b>          | 1.9E+08                          |
| 295.1534                                          | C <sub>16</sub> H <sub>23</sub> O <sub>5</sub> | 295.1545               | 58.0                        | 3                                      | <b>7</b>          | 1.2E+08                          |
| 283.1897                                          | C <sub>16</sub> H <sub>27</sub> O <sub>4</sub> | 283.1909               | 59.1                        | 3                                      |                   | 1.3E+08                          |
| 281.1742                                          | C <sub>16</sub> H <sub>25</sub> O <sub>4</sub> | 281.1753               | 62.8                        | 3                                      |                   | 6.7E+07                          |
| 355.2109                                          | C <sub>19</sub> H <sub>31</sub> O <sub>6</sub> | 355.2121               | 62.8                        | 3                                      |                   | 5.6E+07                          |
| 398.1989                                          | C <sub>13</sub> H <sub>30</sub> O <sub>7</sub> | 298.1992               | 62.9                        | 3                                      |                   | 6.1E+07                          |
| 709.4133                                          | -                                              |                        | 62.9                        | 3                                      |                   | 3.0E+06                          |
| 295.1899                                          | C <sub>17</sub> H <sub>27</sub> O <sub>4</sub> | 295.1909               | 63.4                        | 3                                      |                   | 4.1E+08                          |
| 277.1431                                          | C <sub>16</sub> H <sub>21</sub> O <sub>4</sub> | 277.1440               | 65.8                        | 3                                      |                   | 2.8E+07                          |
| 323.1850                                          | C <sub>18</sub> H <sub>27</sub> O <sub>5</sub> | 323.1859               | 66.2                        | 3                                      |                   | 6.9E+07                          |
| 311.1846                                          | C <sub>17</sub> H <sub>27</sub> O <sub>5</sub> | 311.1858               | 67.4                        | 3                                      | <b>1</b>          | 2.6E+09                          |
| 309.1692                                          | C <sub>17</sub> H <sub>25</sub> O <sub>5</sub> | 309.1702               | 68.4                        | 3                                      | <b>8</b>          | 8.7E+08                          |
| 279.1950                                          | C <sub>17</sub> H <sub>27</sub> O <sub>3</sub> | 279.1960               | 70.4                        | 3                                      |                   | 2.9E+08                          |
| 337.2006                                          | C <sub>19</sub> H <sub>29</sub> O <sub>5</sub> | 337.2015               | 70.8                        | 3                                      |                   | 8.9E+07                          |
| 744.5028                                          | -                                              |                        | 70.9                        | 3                                      |                   | 3.7E+06                          |
| 293.1745                                          | C <sub>17</sub> H <sub>25</sub> O <sub>4</sub> | 293.1753               | 71.2                        | 3                                      |                   | 2.3E+07                          |
| 325.2004                                          | C <sub>18</sub> H <sub>29</sub> O <sub>5</sub> | 325.2015               | 71.5                        | 3                                      | <b>9</b>          | 6.6E+07                          |
| 305.2107                                          | C <sub>19</sub> H <sub>29</sub> O <sub>3</sub> | 305.2117               | 71.9                        | 3                                      |                   | 1.5E+07                          |
| 343.2265                                          | C <sub>22</sub> H <sub>31</sub> O <sub>3</sub> | 343.2273               | 72.3                        | 4                                      | <b>10</b>         | 2.7E+07                          |
| 345.2420                                          | C <sub>22</sub> H <sub>33</sub> O <sub>3</sub> | 345.2430               | 72.3                        | 4                                      | <b>11</b>         | 1.6E+07                          |
| 351.2161                                          | C <sub>20</sub> H <sub>31</sub> O <sub>5</sub> | 351.2172               | 72.7                        | 3                                      |                   | 8.6E+06                          |
| 371.2574                                          | C <sub>24</sub> H <sub>35</sub> O <sub>3</sub> | 371.2586               | 73.6                        | 4                                      | <b>12</b>         | 5.4E+07                          |
| 429.2991                                          | C <sub>27</sub> H <sub>41</sub> O <sub>4</sub> | 429.3005               | 73.7                        | 5                                      | <b>13</b>         | 4.9E+06                          |

**Figure S1.** TLC of *M. tuberculosis* extracts cultured with LDL-<sup>14</sup>C-[1,7,15,22,26]-cholesterol. 10,000 cpm were loaded per lane. TLC was resolved with 75:25 (toluene:acetone v/v) and visualized by autoradiography. **A.** *M. tuberculosis* H37Rv cell pellet. **B.** *M. tuberculosis* H37Rv culture medium. **C.** *M. tuberculosis*  $\Delta$ *igr* cell pellet. **D.** *M. tuberculosis*  $\Delta$ *igr* culture medium. **E.** *igr* complement cell pellet. **F.** *igr* complement culture medium.

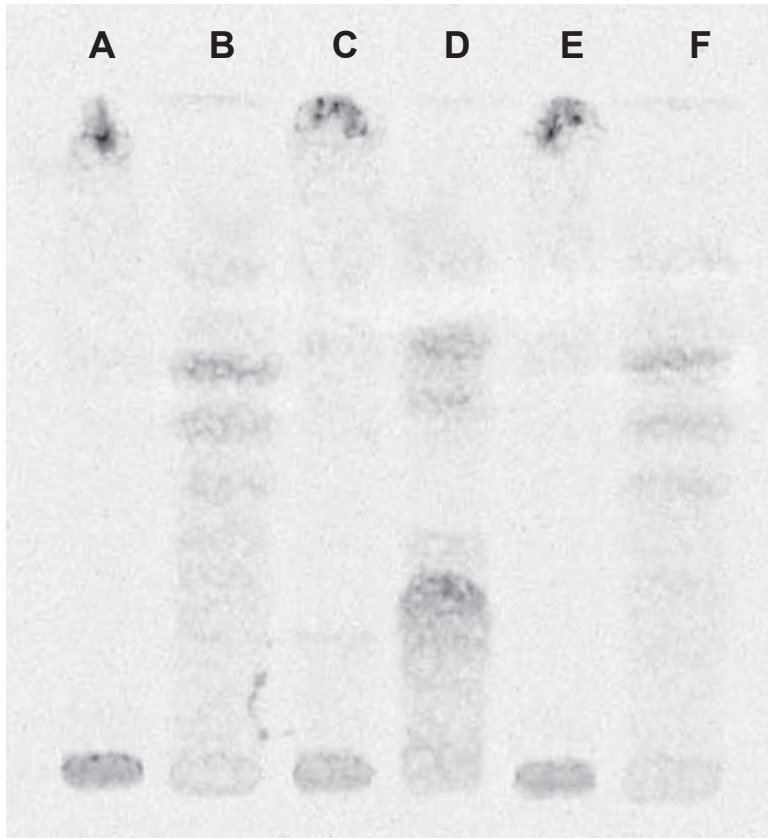

**Figure S2.** Assigned structures of *Δigr* metabolite ions identified by LC/MS/MS.

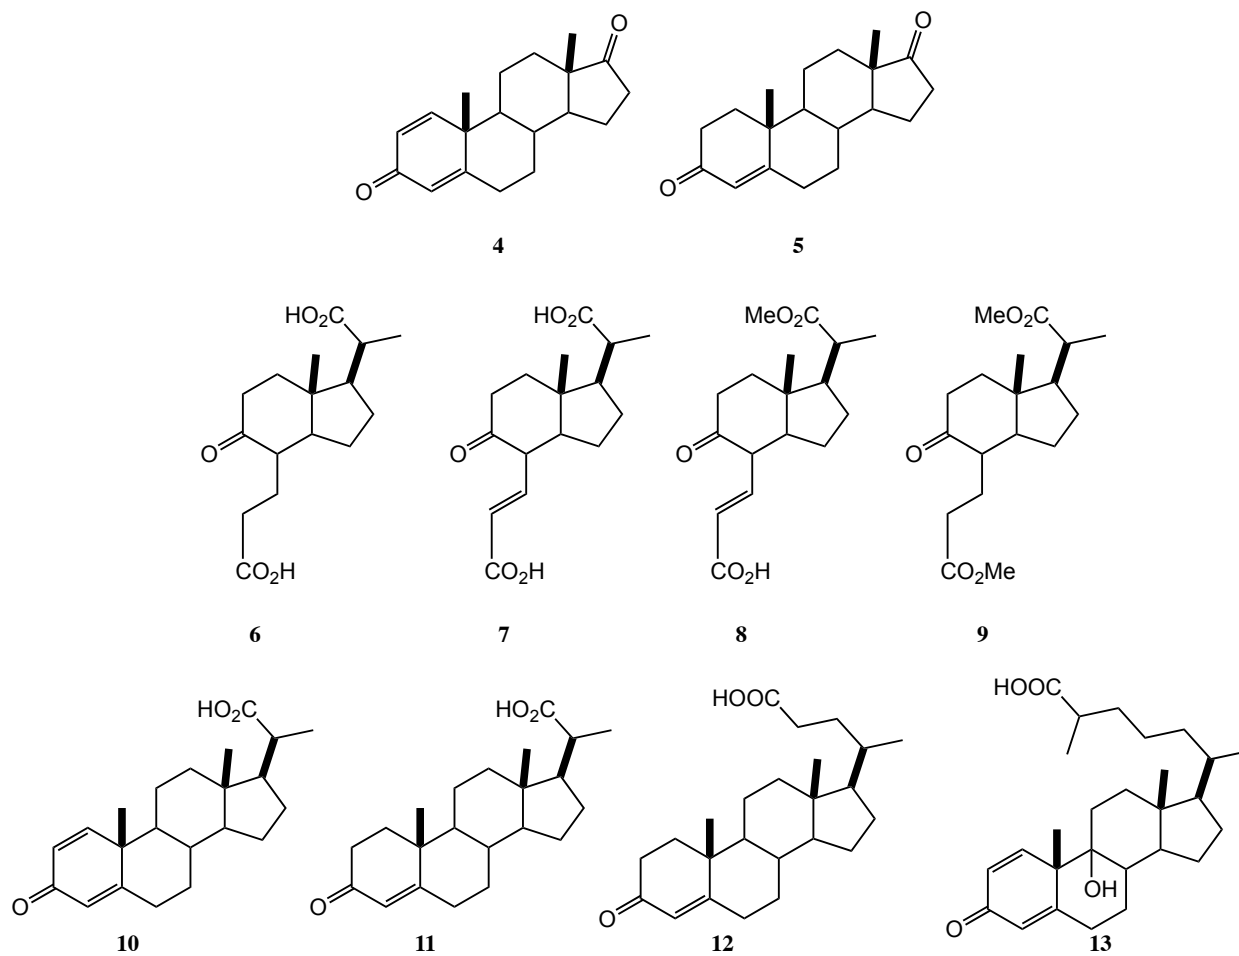

Supplement: supp_M111.313643_jbc.M111.313643-1.pdf [file supp_M111.313643_jbc.M111.313643-1.pdf]
